# Supplementary material for: Boosting the zinc storage of a small-molecule organic cathode by a desalinization strategy
Source: Royal Society of Chemistry journal article supplement (doi:10.1039/d3sc03435f), 2023-01-01
Supplement: d3sc03435f1.pdf [file d3sc03435f1.pdf]

## Supporting Information

### **Boosting zinc storage of small-molecule organic cathode by a desalinization strategy**

Wei Wang,<sup>a,1</sup> Ying Tang,<sup>a,1</sup> Jun Liu,<sup>b</sup> Hongbao Li,<sup>\*a</sup> Rui Wang,<sup>a</sup> Longhai Zhang,<sup>a</sup> Fei Liang,<sup>a</sup> Wei Bai,<sup>\*a</sup> Lin Zhang,<sup>c</sup> Chaofeng Zhang<sup>\*a</sup>

*<sup>a</sup> Institutes of Physical Science and Information Technology, Leibniz International Joint Research Center of Materials Sciences of Anhui Province, Anhui Province Key Laboratory of Environment-Friendly Polymer Materials, Key Laboratory of Structure and Functional Regulation of Hybrid Material (Ministry of Education), Anhui University, Hefei 230601, China.*

*<sup>b</sup> School of Materials Science and Engineering, Guangdong Provincial Key Laboratory of Advanced Energy Storage Materials, South China University of Technology, Guangzhou 510640, China.*

*<sup>c</sup> Institute for Solid State Physics Laboratory of Nano and Quantum Engineering, Leibniz University Hannover, Appelstrasse 2, 30167 Hannover, Germany.*

\*Corresponding Authors: lihb@ahu.edu.cn (H. Li), baiwei@ahu.edu.cn (W. Bai), cfz@ahu.edu.cn (C. Zhang)

<sup>1</sup> These authors contributed equally to this work

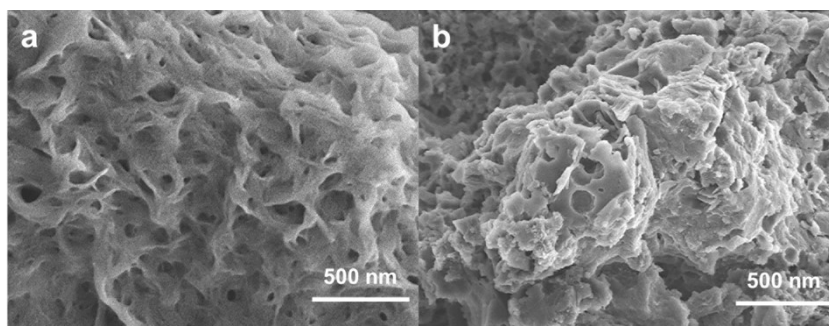

**Fig. S1** SEM images of (a) RSS and (b) TRT.

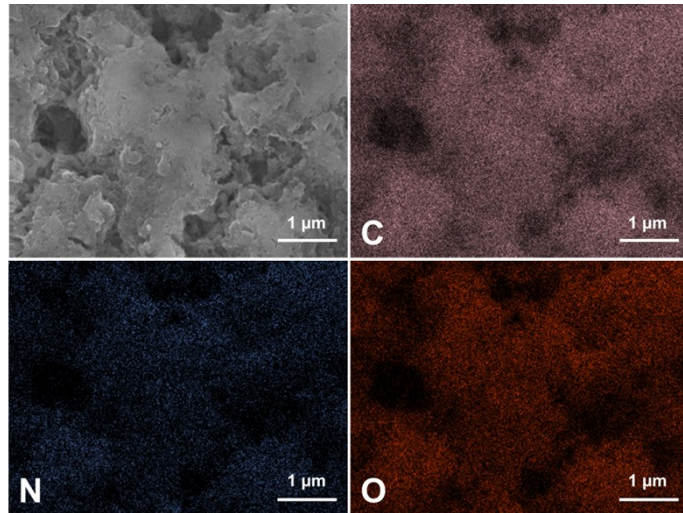

**Fig. S2** SEM images of TRT and the corresponding elemental mapping results.

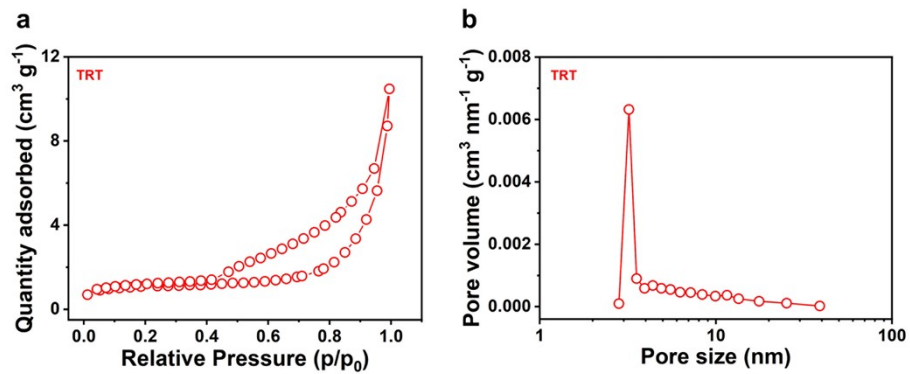

**Fig. S3** (a)  $\text{N}_2$  adsorption-desorption curves, and (b) pore size distribution plots of TRT.

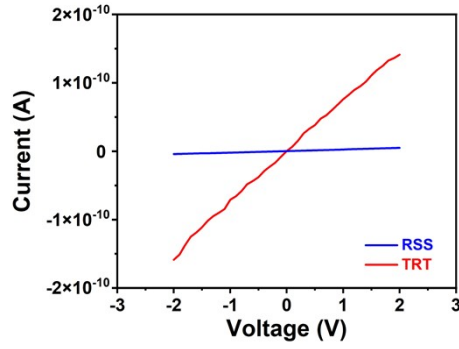

**Fig. S4** V-I plot of TRT.

The resistivity is calculated according to the relationship between the voltage (V) and current (I) as follow:

$$\rho = \frac{VS}{IL}$$

The conductivity ( $\sigma$ ) is calculated using the following equation:

$$\sigma = \frac{1}{\rho}$$

S and L are cross-sectional area and length between two electrodes, respectively.

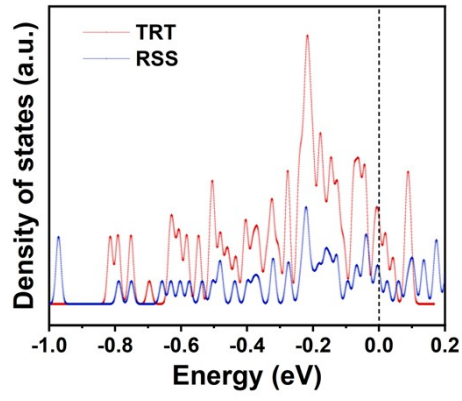

**Fig. S5** Calculated density of states of RSS and TRT as indicated.

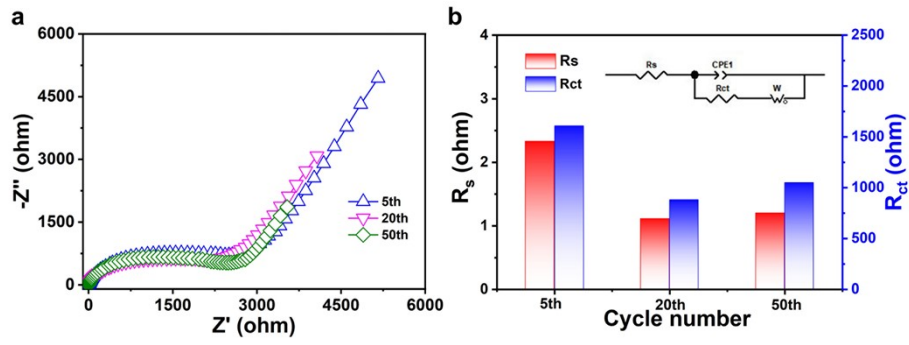

**Fig. S6** (a) EIS measurements of TRT, the Nyquist plots and (b) impedance fitting diagram of TRT under different cycles (5th, 20th, and 50th).

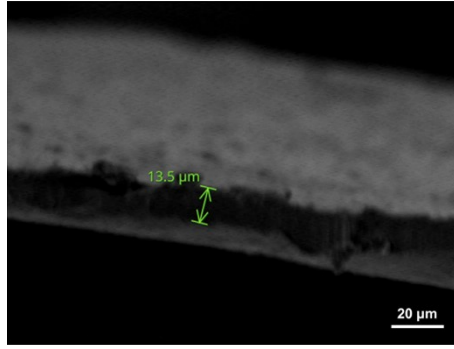

**Fig. S7** Cross-sectional image of the TRT electrode.



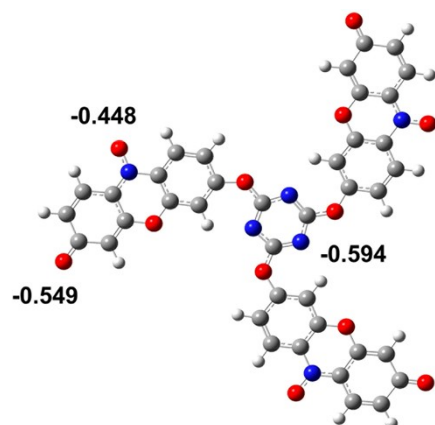

**Fig. S8** The planar structure of the TRT molecule and the charge distributions of the most negative atoms.

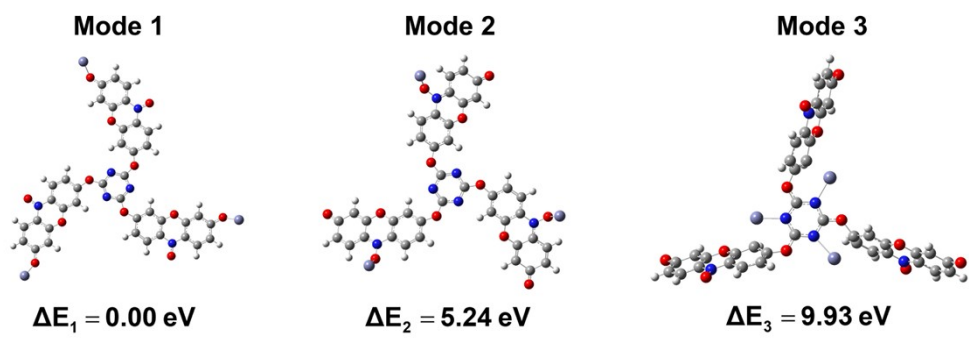

**Fig. S9** Various modes of Zn storage states for the TRT cathode.

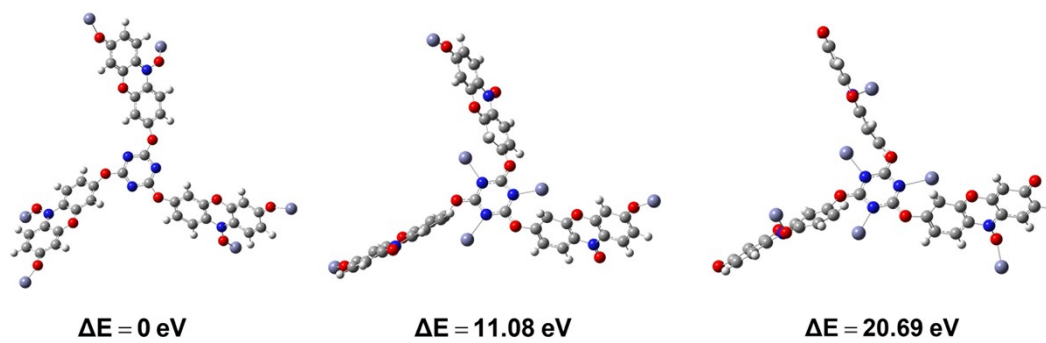

**Fig. S10** Three possible adsorption conformations with six zinc ions in different groups and their relative electronic energies (in eV).

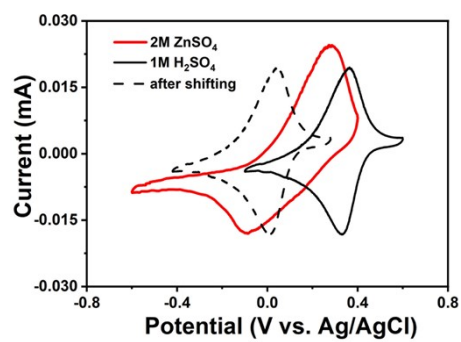

**Fig. S11** Typical CV curves of TRT at a scan rate of  $1 \text{ mV s}^{-1}$  in 2M ZnSO<sub>4</sub> and 1M H<sub>2</sub>SO<sub>4</sub> electrolyte.
